# Supplementary material for: Modified chemical synthesis of MnS nanoclusters on nickel foam for high performance all-solid-state asymmetric supercapacitors
Source: Royal Society of Chemistry journal article supplement (doi:10.1039/c7ra00772h), 2017-01-01
Supplement: c7ra00772h1.pdf [file c7ra00772h1.pdf]

Note after first publication: This version of the Electronic Supporting Information replaces the version originally published on March 16, 2017.

## Supporting Information

### Modified chemical synthesis of MnS nanoclusters on nickel foam for high-performance all-solid-state asymmetric supercapacitors

Vijay S. Kumbhar, Yong Rok Lee,<sup>1</sup> Choon Sup Ra,<sup>2</sup> Dirk Tuma,<sup>3</sup> Bong-Ki Min,<sup>4</sup> and Jae-Jin Shim\*

<sup>1</sup>*School of Chemical Engineering, Yeungnam University, Gyeongsan, Gyeongbuk 38541, Republic of Korea*

<sup>2</sup>*Department of Chemistry, Yeungnam University, Gyeongsan, Gyeongbuk, Republic of Korea*

<sup>3</sup>*BAM Federal Institute for Materials Research and Testing, Berlin, Germany*

<sup>4</sup>*Central Instrumental Analysis Center, Yeungnam University, Gyeongsan, Gyeongbuk, Republic of Korea*

### Equation for calculating the specific capacitance from the CV data

$$C_s = \frac{\int_{V_1}^{V_2} i dV}{(V_2 - V_1) m} \quad (S1)$$

where  $C_s$  is the specific capacitance,  $i$  is the current response to the given voltage  $V$ ,  $V_1$  is the lower potential limit,  $V_2$  is the upper potential limit,  $v$  is the scan rate, and  $m$  is the mass of electrode (g).

### Equation for calculating the specific capacitance from the charge-discharge data

$$C_s = \frac{I \cdot \Delta t}{m \Delta V}, \quad (S2)$$

Note after first publication: This version of the Electronic Supporting Information replaces the version originally published on March 16, 2017.

where  $C_s$  is the specific capacitance ( $F g^{-1}$ ),  $I$  is the discharge current (A),  $m$  is the mass of electrode (g), and  $\Delta V$  is the potential window (V).

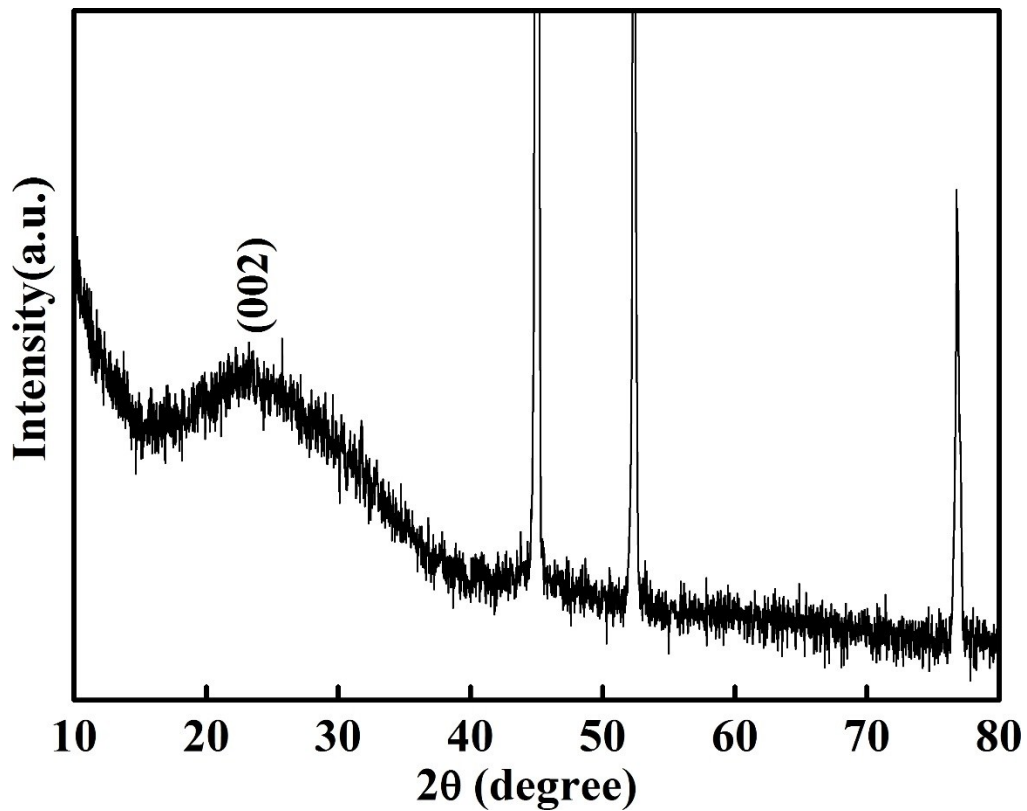

Fig. S1. XRD pattern of the hydrothermally reduced GO.

Note after first publication: This version of the Electronic Supporting Information replaces the version originally published on March 16, 2017.

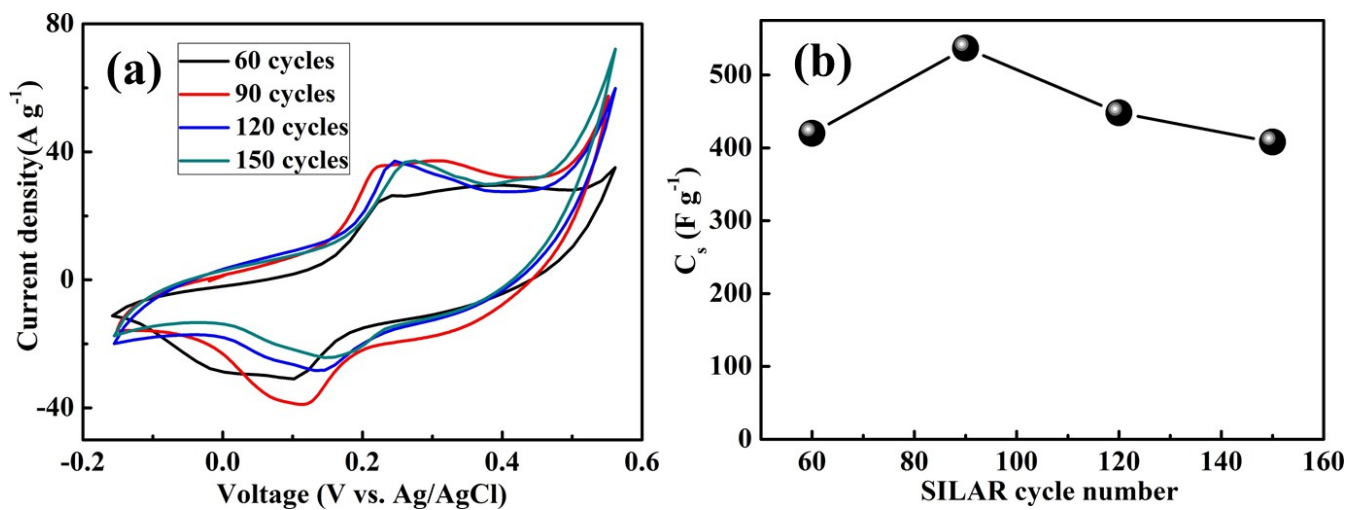

Fig. S2. (a) CV curves of MnS@NF electrodes at a fixed scan rate of 100 mV s<sup>-1</sup> in 6M KOH and (b) their variation of C<sub>s</sub> upon the number of SILAR cycles.

Note after first publication: This version of the Electronic Supporting Information replaces the version originally published on March 16, 2017.

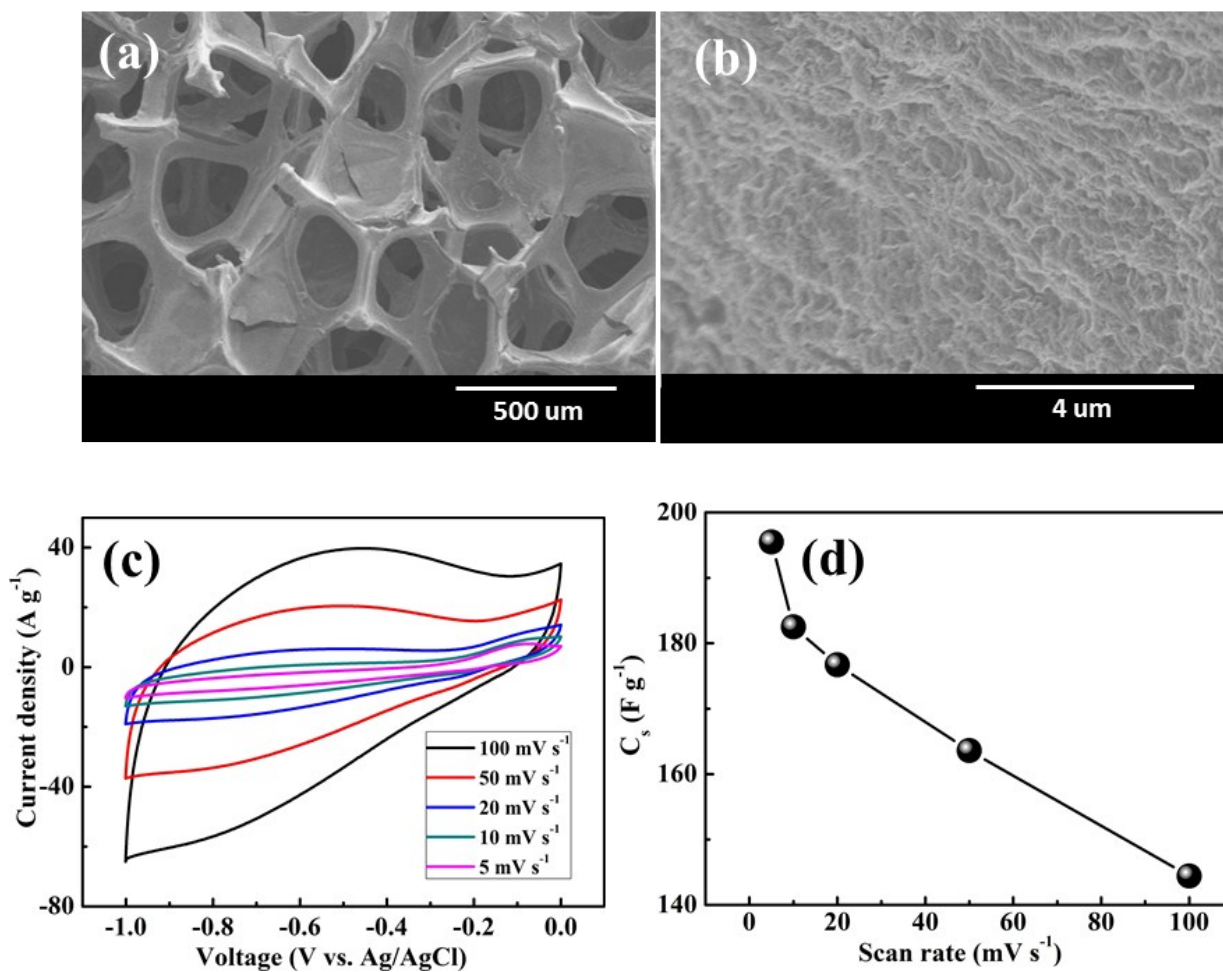

Fig. S3. (a, b) FE-SEM images of the hydrothermally reduced GO on NF, (c) CVs of rGO@NF electrode in 6 M KOH at various scan rates, and (d) the variation of C<sub>s</sub> of rGO@NF as a function of the scan rate.

Note after first publication: This version of the Electronic Supporting Information replaces the version originally published on March 16, 2017.

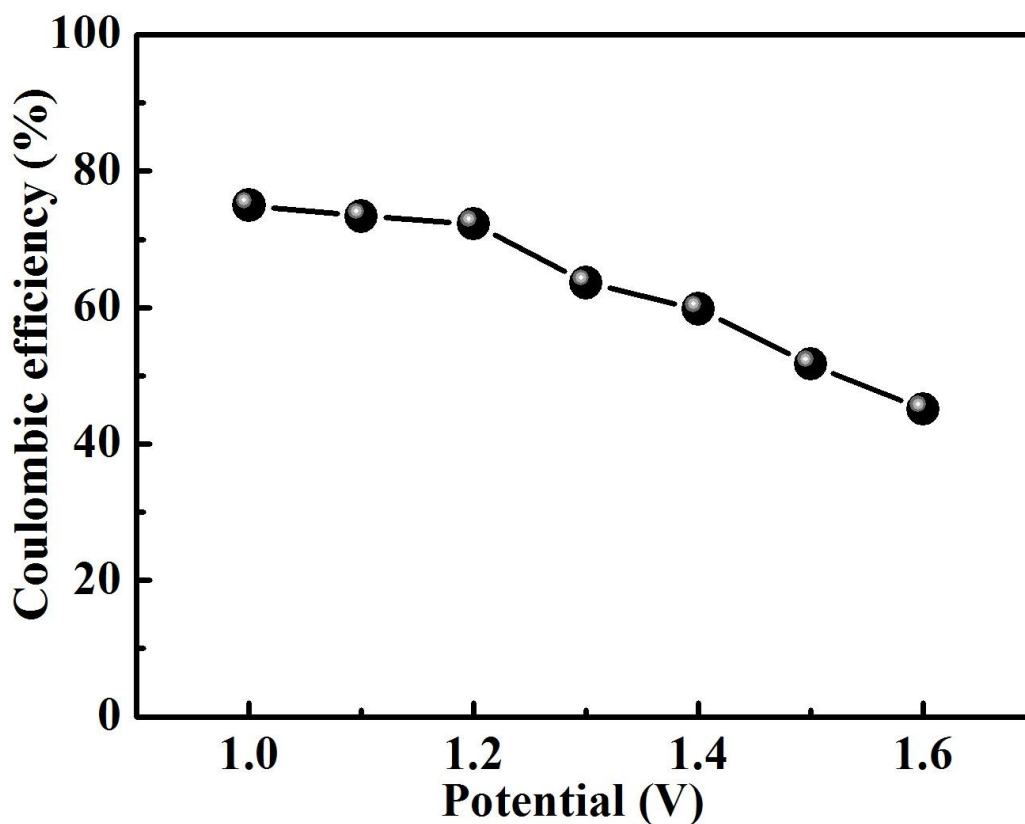

Fig. S4 Coulombic efficiency of the MnS@NF//rGO@NF ASC at various potential windows.

Table S1. Parameter values for fitting the Nyquist plots of the as-prepared MnS@NF electrode before cycling and after 5000 cycles in a 3 electrode system.

| Parameter                              | Before cycling | Parameter                               | After 5000 cycles |
|----------------------------------------|----------------|-----------------------------------------|-------------------|
| C (mF)                                 | 0.49           | C' (mF)                                 | 0.50              |
| R <sub>s</sub> (Ω)                     | 0.48           | R' <sub>s</sub> (Ω)                     | 0.63              |
| R <sub>ct</sub> (Ω)                    | 1.20           | A' <sub>w1</sub> (Ω s <sup>-0.5</sup> ) | 14.2              |
| A <sub>w</sub> (Ω s <sup>-0.5</sup> )  | 65.6           | A' <sub>w2</sub> (Ω s <sup>-0.5</sup> ) | 99.5              |
| W <sub>or</sub> (Ω s <sup>-0.5</sup> ) | 15.5           | -                                       | -                 |
| W <sub>oc</sub> (Ω s <sup>-0.5</sup> ) | 0.082          | -                                       | -                 |

Note after first publication: This version of the Electronic Supporting Information replaces the version originally published on March 16, 2017.

**Table S2. Parameter values for fitting the Nyquist plots of the as-prepared**

| <b>Parameter</b>       | <b>Before cycling</b> | <b>Parameter</b>                    | <b>After 2000 cycles</b> |
|------------------------|-----------------------|-------------------------------------|--------------------------|
| $R_s$ ( $\Omega$ )     | 0.72                  | $C'_1$ (mF)                         | 1.40                     |
| $R_{ct1}$ ( $\Omega$ ) | 1083                  | $C'_2$ (mF)                         | 1.19                     |
| $R_{ct2}$ ( $\Omega$ ) | 12.4                  | $R'_s$ ( $\Omega$ )                 | 1.66                     |
| $P_1$                  | 0.00019               | $R'_{ct}$ ( $\Omega$ )              | 2078                     |
| $n_1$                  | 0.78                  | $A'_w$ ( $\Omega\text{ s}^{-0.5}$ ) | 4947                     |
| $P_2$                  | 0.00029               | -                                   | -                        |
| $n_2$                  | 0.63                  | -                                   | -                        |

**MnS@NF//rGO@NF ASC before cycling and after 2000 cycles.**

**Table S3. Comparison of the energy and power densities of different MnS-based asymmetric supercapacitors**

| <b>Ref. No.</b> | <b>Symmetric/Asymmetric supercapacitor</b> |                           | <b>Electrolyte</b> | <b>Potential window (V)</b> | <b><math>C_s</math> (F g<sup>-1</sup>)</b> | <b>Highest energy density (Wh kg<sup>-1</sup>)</b> | <b>Highest power density (kW kg<sup>-1</sup>)</b> |
|-----------------|--------------------------------------------|---------------------------|--------------------|-----------------------------|--------------------------------------------|----------------------------------------------------|---------------------------------------------------|
|                 | <b>Positive electrode</b>                  | <b>Negative electrode</b> |                    |                             |                                            |                                                    |                                                   |

Note after first publication: This version of the Electronic Supporting Information replaces the version originally published on March 16, 2017.

|    |                                     |                    |                    |                |                                                        |             |             |
|----|-------------------------------------|--------------------|--------------------|----------------|--------------------------------------------------------|-------------|-------------|
| 1. | MnS nanocrystals                    | Activated carbon   | KOH agar gel       | 0 ~ 1.6        | 110.4 F g <sup>-1</sup><br>at 1 A g <sup>-1</sup>      | 37.6        | 5.9         |
| 2. | Tetrapod nanorod MnS nanocrystals   | Activated carbon   | 2 M KOH aqueous    | 0 ~ 1.6        | 59.8 F g <sup>-1</sup><br>at 1 mV s <sup>-1</sup>      | 13.1        | 4.45        |
| 3. | $\alpha$ -MnS/<br>N-doped rGO       | Nitrogen-doped rGO | 3 M KOH aqueous    | 0 ~ 1.6        | 77.9 F g <sup>-1</sup><br>at 1 A g <sup>-1</sup>       | 27.7        | 20          |
| 4. | MnS/GO-NH <sub>3</sub>              | Activated carbon   | 2 M KOH aqueous    | 0 ~ 1.6        | 73.6 F g <sup>-1</sup><br>at 1 mV s <sup>-1</sup>      | 14.9        | 4.6         |
| 5. | MnS microfibers                     | MnS microfibers    | PVA-KOH gel        | -0.6 ~ 0.6     | 68.3 F g <sup>-1</sup><br>at 3 mA                      | 18.9        | 0.25        |
| 6. | <b>MnS nanoclusters (This work)</b> | <b>rGO</b>         | <b>PVA-KOH gel</b> | <b>0 ~ 1.6</b> | <b>104 F g<sup>-1</sup><br/>at 5 mV s<sup>-1</sup></b> | <b>34.1</b> | <b>12.8</b> |

#### References:

1. T. Chen, Y. Tang, Y. Qiao, Z. Liu, W. Guo, J. Song, S. Mu, S. Yu, Y. Zhao and F. Gao, *Sci. Rep.*, 2016, 6, 23289-23297.
2. Y. Tang, T. Chen and S. Yu, *Chem. Comm.*, 2015, 51, 9018-9021.
3. H. Quan, B. Cheng, D. Chen, X. Su, Y. Xiao and S. Lei, *Electrochim. Acta*, 2016, 210, 557-566.
4. Y. Tang, T. Chen, S. Yu, Y. Qiao, S. Mu, J. Hu and F. Gao, *J. Mater. Chem. A*, 2015, 3, 12913-12919.
5. R. B. Pujari, A. C. Lokhande, A. A. Yadav, J. H. Kim and C. D. Lokhande, *Mater. Des.*, 2016, 108, 510-517.
